# Supplementary material for: 2D lead-free organic–inorganic hybrid exhibiting dielectric and structural phase transition at higher temperatures
Source: Royal Society of Chemistry journal article supplement (doi:10.1039/d2ce00541g), 2022-01-01
Supplement: d2ce00541g1.pdf [file d2ce00541g1.pdf]

## Supplementary Information

Ting Shao, <sup>a</sup> Jun Miao Gong, <sup>a</sup> Jia Liu, <sup>a</sup> Li Jun Han, <sup>a</sup> Ming Chen, <sup>b</sup> Qiangqiang Jia, <sup>\*a</sup> Hai Feng Lu<sup>\*a</sup> and Da Wei Fu<sup>\*a</sup>

(*a* Institute for Science and Applications of Molecular Ferroelectrics, Key Laboratory of the Ministry of Education for Advanced Catalysis Materials, Zhejiang Normal University, Jinhua, 321004, People's Republic of China.)

*b* Ordered Matter Science Research Center, Jiangsu Key Laboratory for Science and Applications of Molecular Ferroelectrics, Southeast University, Nanjing, 211189, People's Republic of China.)

### Experimental Measurement Methods

#### Hirshfeld Surfaces and Intermolecular Interaction Analysis.

For compounds **1**, the CrystalExplorer program was used to input the structure file in CIF format at 273 K, respectively, to calculate the Hirshfeld surface and 2D fingerprint<sup>1</sup>. The intensity of molecular interaction is expressed by mapping to the Hirshfeld surface using the corresponding red-blue-white scheme: where red, white, and blue represent contacts shorter than, equal to, and longer than the van der Waals distance, respectively. In the 2D fingerprint map, each point represents a pair ( $d_i$ ,  $d_e$ ), reflecting the distance between the inner ( $d_i$ ) and outer ( $d_e$ ) nearest atoms of the Hirshfeld  $d_{\text{norm}}$  surface. The normalized contact distance  $d_{\text{norm}}$  is based on  $d_e$ ,  $d_i$  and the van der Waals (vdW) radii of the two atoms external ( $r_e^{\text{vdW}}$ ) and internal ( $r_i^{\text{vdW}}$ ) to the surface:

$$d_{\text{norm}} = \frac{d_i - r_i^{\text{vdW}}}{r_i^{\text{vdW}}} + \frac{d_e - r_e^{\text{vdW}}}{r_e^{\text{vdW}}}$$

$d_{\text{norm}}$  surface represents close intermolecular interactions.

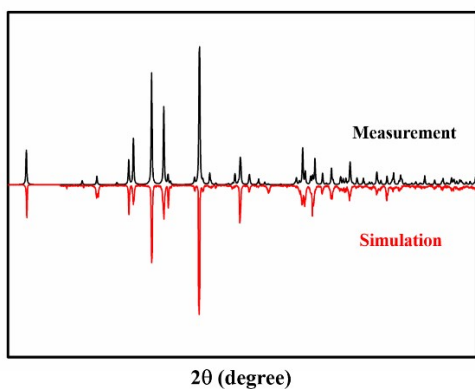

**Figure S1** Measured and simulated powder X-ray diffraction patterns of compound **1**.

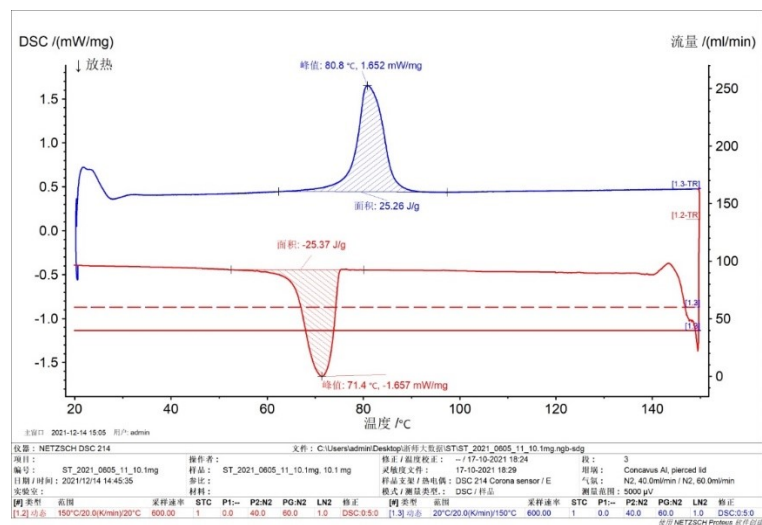

**Figure S2** The original integration diagram of DSC curves.

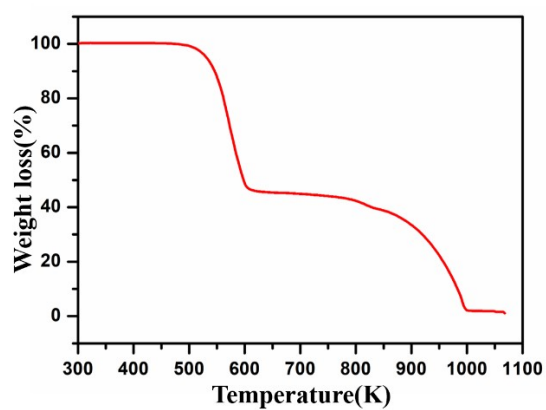

**Figure S3** TGA curve of compounds **1** in the temperature range of 300 K-1050 K.

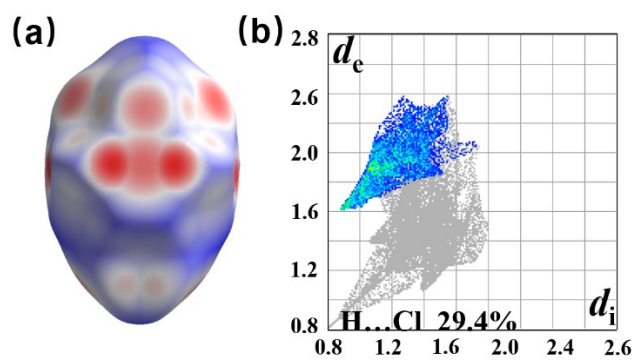

**Figure S4** (a) Hirshfeld surface of compound **1** at 373 K. (b) 2D fingerprint plot of compound **1** at 373 K.

**Table S1.** Crystal data and structure refinements for compound at 273 K and 373 K.

|                                                    | LTP (273 K)                                                                    | HTP (373 K)                                                                    |
|----------------------------------------------------|--------------------------------------------------------------------------------|--------------------------------------------------------------------------------|
| Empirical formula                                  | C <sub>8</sub> H <sub>16</sub> CdCl <sub>4</sub> F <sub>4</sub> N <sub>2</sub> | C <sub>8</sub> H <sub>16</sub> CdCl <sub>4</sub> F <sub>4</sub> N <sub>2</sub> |
| Formula weight                                     | 470.43                                                                         | 470.43                                                                         |
| Space group                                        | <i>C</i> <sub>2</sub> / <i>c</i>                                               | <i>P</i> 4 <sub>2</sub> / <i>ncm</i>                                           |
| Crystal system                                     | Monoclinic                                                                     | Tetragonal                                                                     |
| <i>a</i> / Å                                       | 26.252                                                                         | 7.747                                                                          |
| <i>b</i> / Å                                       | 7.5959                                                                         | 7.747                                                                          |
| <i>c</i> / Å                                       | 7.6397                                                                         | 26.484                                                                         |
| <i>β</i> /°                                        | 95.399                                                                         | 90                                                                             |
| Volume/ Å <sup>3</sup>                             | 1516.6                                                                         | 1589.4                                                                         |
| <i>Z</i>                                           | 4                                                                              | 4                                                                              |
| F(000)                                             | 920                                                                            | 920                                                                            |
| GOF                                                | 1.177                                                                          | 1.030                                                                          |
| <i>R</i> <sub>1</sub> [ <i>I</i> >2σ( <i>I</i> )]  | 0.1220                                                                         | 0.0723                                                                         |
| <i>wR</i> <sub>2</sub> [ <i>I</i> >2σ( <i>I</i> )] | 0.3419                                                                         | 0.2869                                                                         |

**Table S2.** Selected bond lengths [Å] and bond angles at 273 K.

| bond lengths [Å]       |           | bond angles [°]                           |             |
|------------------------|-----------|-------------------------------------------|-------------|
| Cd1—C11 <sup>i</sup>   | 2.482 (2) | C11 <sup>i</sup> —Cd1—C11                 | 180.0       |
| Cd1—C11                | 2.482 (2) | C11 <sup>i</sup> —Cd1—C12                 | 88.79 (7)   |
| Cd1—C12                | 2.722 (2) | C11—Cd1—C12                               | 91.21 (7)   |
| Cd1—C12 <sup>i</sup>   | 2.722 (2) | C11 <sup>i</sup> —Cd1—C12 <sup>i</sup>    | 91.21 (7)   |
| Cd1—C12 <sup>ii</sup>  | 2.748 (2) | C11—Cd1—C12 <sup>i</sup>                  | 88.79 (7)   |
| Cd1—C12 <sup>iii</sup> | 2.748 (2) | C12—Cd1—C12 <sup>i</sup>                  | 180.0       |
| C12—Cd1 <sup>iv</sup>  | 2.748 (2) | C11 <sup>i</sup> —Cd1—C12 <sup>ii</sup>   | 87.21 (7)   |
|                        |           | C11—Cd1—C12 <sup>ii</sup>                 | 92.79 (7)   |
|                        |           | C12—Cd1—C12 <sup>ii</sup>                 | 90.816 (18) |
|                        |           | C12 <sup>i</sup> —Cd1—C12 <sup>ii</sup>   | 89.184 (18) |
|                        |           | C11 <sup>i</sup> —Cd1—C12 <sup>iii</sup>  | 92.79 (7)   |
|                        |           | C11—Cd1—C12 <sup>iii</sup>                | 87.21 (7)   |
|                        |           | C12—Cd1—C12 <sup>iii</sup>                | 89.184 (18) |
|                        |           | C12 <sup>i</sup> —Cd1—C12 <sup>iii</sup>  | 90.816 (18) |
|                        |           | C12 <sup>ii</sup> —Cd1—C12 <sup>iii</sup> | 180.0       |
|                        |           | Cd1—C12—Cd1 <sup>iv</sup>                 | 159.97 (9)  |

**Table S3.** Selected bond lengths [ $\text{\AA}$ ] and bond angles at 373 K.

| bond lengths [ $\text{\AA}$ ] |            | bond angles [ $^\circ$ ]               |             |
|-------------------------------|------------|----------------------------------------|-------------|
| Cd1—Cl3                       | 2.462 (3)  | Cl3 <sup>i</sup> —Cd1—Cl3              | 180.0       |
| Cd1—Cl3 <sup>i</sup>          | 2.462 (3)  | Cl3 <sup>i</sup> —Cd1—Cl2 <sup>i</sup> | 90.0        |
| Cd1—Cl2 <sup>i</sup>          | 2.7389     | Cl3—Cd1—Cl2 <sup>i</sup>               | 90.0        |
| Cd1—Cl2                       | 2.7389     | Cl3 <sup>i</sup> —Cd1—Cl2              | 90.0        |
| Cd1—Cl1                       | 2.7784 (8) | Cl3—Cd1—Cl2                            | 90.0        |
| Cd1—Cl1 <sup>i</sup>          | 2.7784(9)  | Cl2 <sup>i</sup> —Cd1—Cl2              | 180.0       |
| Cl1—Cd1 <sup>ii</sup>         | 2.7784 (8) | Cl3 <sup>i</sup> —Cd1—Cl1              | 89.53 (14)  |
| Cl2—Cd1 <sup>iii</sup>        | 2.7389     | Cl3—Cd1—Cl1                            | 90.47 (14)  |
|                               |            | Cl2 <sup>i</sup> —Cd1—Cl1              | 90.0        |
|                               |            | Cl2—Cd1—Cl1                            | 90.0        |
|                               |            | Cl3 <sup>i</sup> —Cd1—Cl1 <sup>i</sup> | 90.47 (14)  |
|                               |            | Cl3—Cd1—Cl1 <sup>i</sup>               | 89.53 (14)  |
|                               |            | Cl2 <sup>i</sup> —Cd1—Cl1 <sup>i</sup> | 90.0        |
|                               |            | Cl2—Cd1—Cl1 <sup>i</sup>               | 90.0        |
|                               |            | Cl1—Cd1—Cl1 <sup>i</sup>               | 180.0       |
|                               |            | Cd1 <sup>ii</sup> —Cl1—Cd1             | 160.67 (19) |
|                               |            | Cd1 <sup>iii</sup> —Cl2—Cd1            | 180.0       |

**Table S4.** H<sub>inside</sub>-Cl<sub>outside</sub> surface area, mean  $d_i$  and mean  $d_e$  in compound **1**.

| Compound | Temperature | H <sub>inside</sub> -Cl <sub>outside</sub> surface area | Mean $d_i$ | Mean $d_e$ |
|----------|-------------|---------------------------------------------------------|------------|------------|
| <b>1</b> | 273 K       | 30.5%                                                   | 1.5085     | 1.7491     |
|          | 373 K       | 29.4%                                                   | 1.3185     | 1.6284     |

**Table S5.** Hydrogen-bond geometry ( $\text{\AA}$ ,  $^\circ$ ) for compound **1** at 273 K.

| D—H    | D(D—H) | D(H $\cdots$ A) | <DHA   | D(D $\cdots$ A) | A   |
|--------|--------|-----------------|--------|-----------------|-----|
| N1-H1A | 0.89   | 2.617           | 161.5  | 3.472           | Cl2 |
| N1-H1B | 0.89   | 2.816           | 113.7  | 3.277           | Cl2 |
| N1-H1C | 0.89   | 2.842           | 121.62 | 3.394           | Cl2 |
| N1-H1C | 0.89   | 2.696           | 117.69 | 3.208           | Cl1 |
| N1-H1C | 0.89   | 2.901           | 121.05 | 3.445           | Cl1 |
| C4-H4A | 0.97   | 2.587           | 110.24 | 3.061           | F2  |
| C4-H4A | 0.97   | 2.406           | 177.68 | 3.376           | F1  |

Symmetry codes: x, y+1, z; x, -y+1, z+1/2; -x+1/2, y+1/2, -z+1/2; x, -y+1, z-1/2; -x+1, -y+2, -z+1; x, -y+2, z+1/2.

**Table S6.** Hydrogen-bond geometry (Å, °) for compound **1** at 373 K.

| <b>D—H</b> | <b>D(D—H)</b> | <b>D(H···A)</b> | <b>&lt;DHA</b> | <b>D(D···A)</b> | <b>A</b> |
|------------|---------------|-----------------|----------------|-----------------|----------|
| N1-H1B_a   | 0.89          | 2.95            | 112.68         | 3.394           | C13      |
| N1-H1B_a   | 0.89          | 2.651           | 157.03         | 3.488           | C12      |
| N1-H1C_a   | 0.89          | 2.599           | 149.09         | 3.394           | C13      |
| N1-H1D_a   | 0.89          | 2.807           | 129.24         | 3.44            | C11      |
| N1-H1D_a   | 0.89          | 2.759           | 139.99         | 3.488           | C12      |
| C6_a-H6B_a | 0.96          | 2.542           | 131.08         | 3.254           | F1_a     |

Symmetry codes: x-1, y, z; -x, -y+1, -z+1; -x+1/2, -y+3/2, z; -y+1, x+1/2, -z+3/2.

## Reference

1. Turner, M. J.; McKinnon, J. J.; Wolff, S. K.; Grimwood, D. J.; Spackman, P. R.; Jayatilaka, D.; Spackman, M. A. *CrystalExplorer17*; University of Western Australia, 2017, <http://hirshfeldsurface.net>
